# Supplementary material for: Genome-Wide Identification and Spatial Expression Analysis of Histone Modification Gene Families in the Rubber Dandelion Taraxacum kok-saghyz
Source: MDPI journal article supplement (doi:10.3390/plants11162077), 2022-08-09
Supplement: s1 [file s1]

# TksHDAs

## ClassI

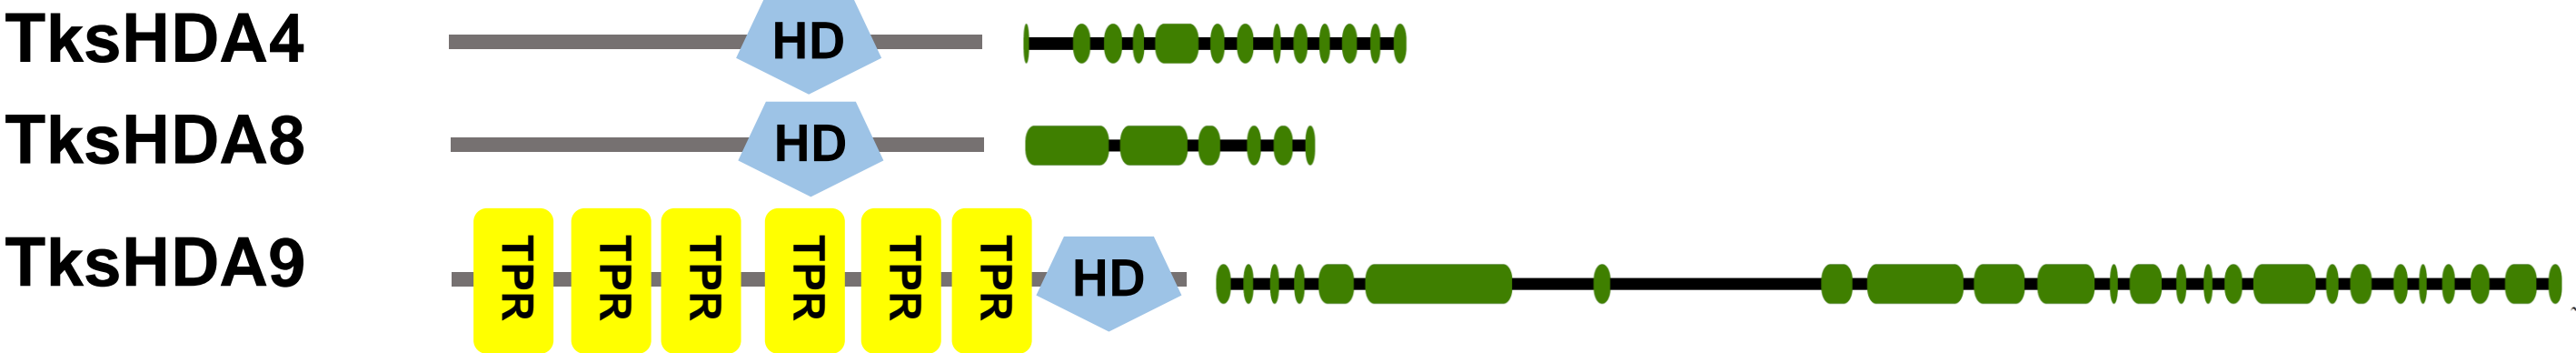

## ClassII

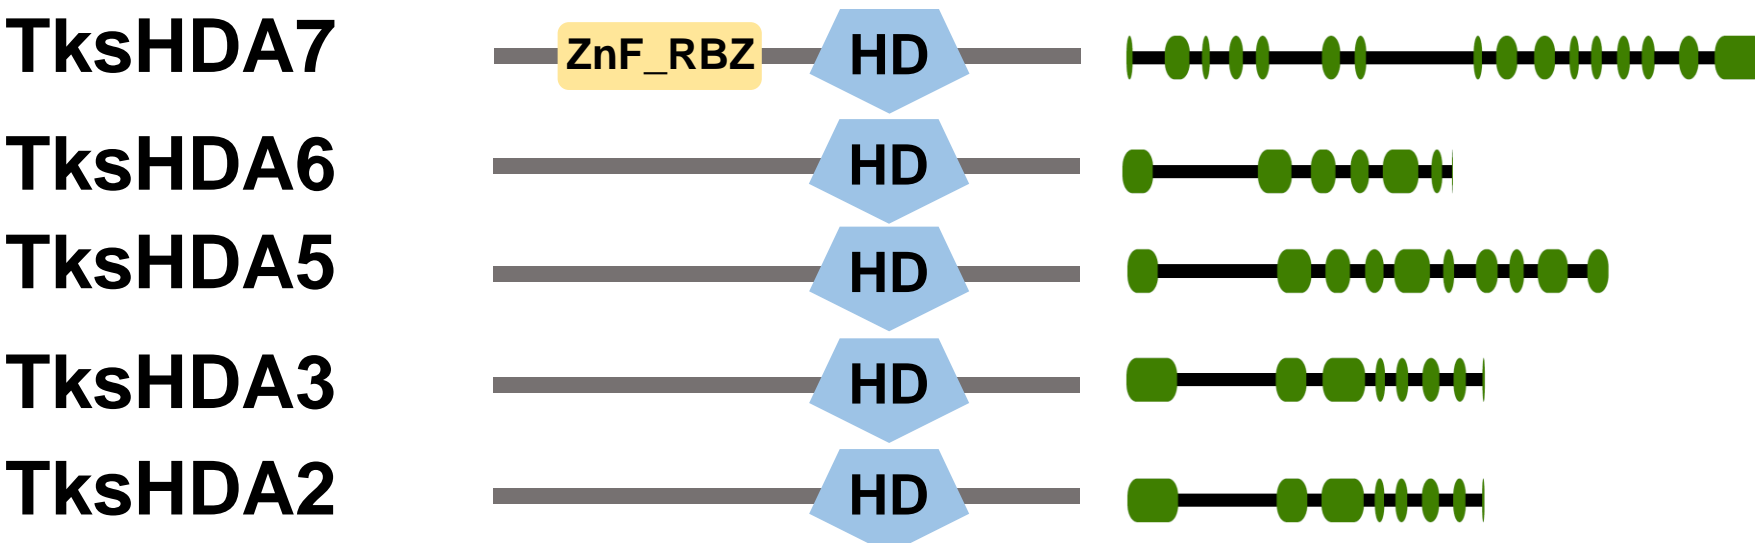

## ClassIII

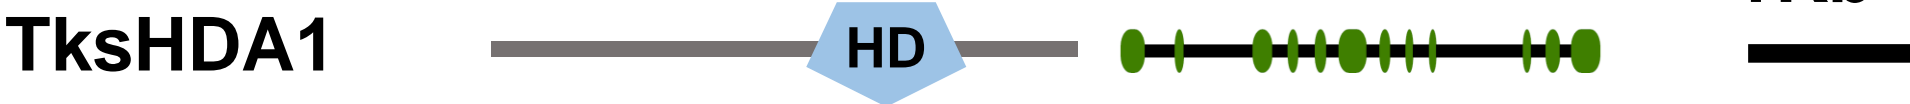

### HDAs Legend:

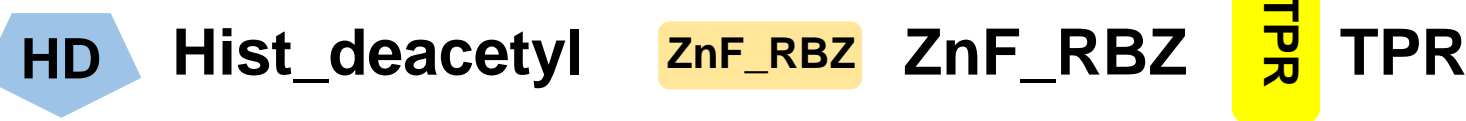

# TksSRTs

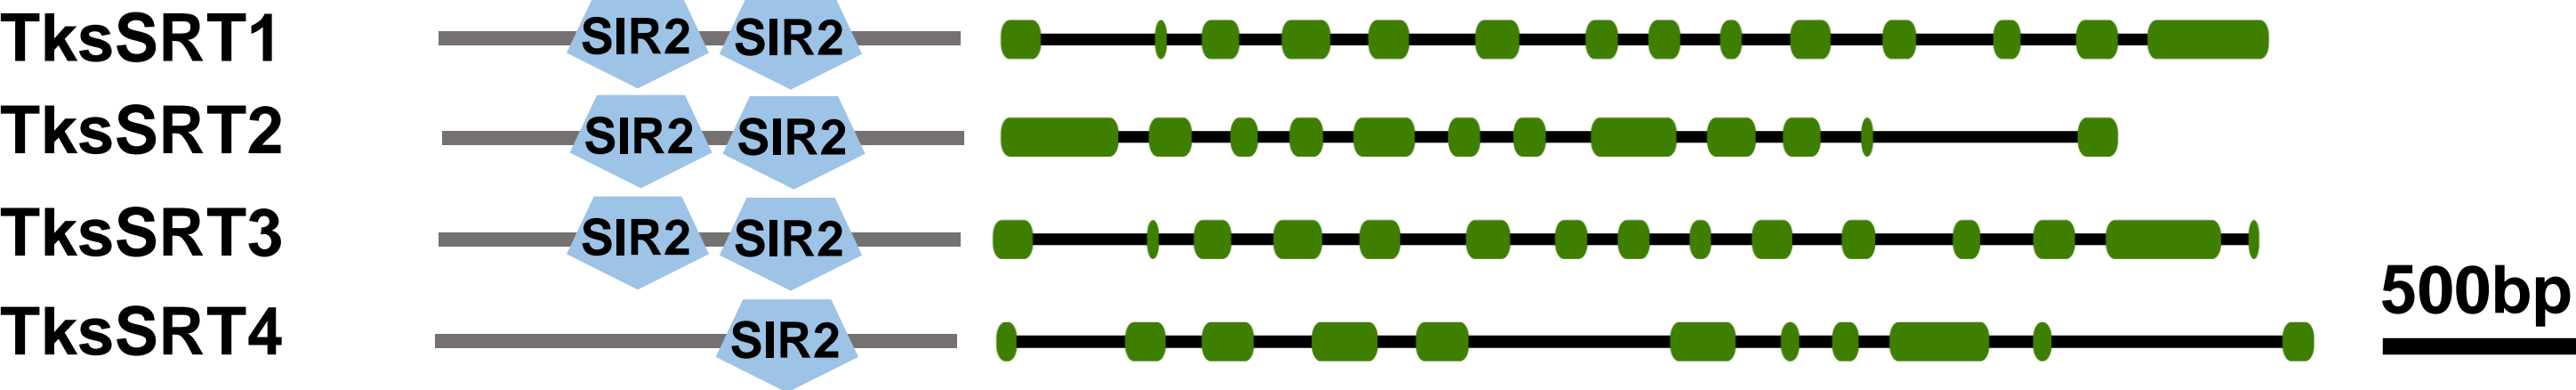

### SRTs Legend:

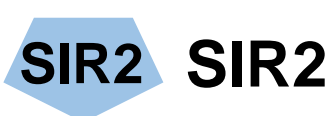

# TksHDTs

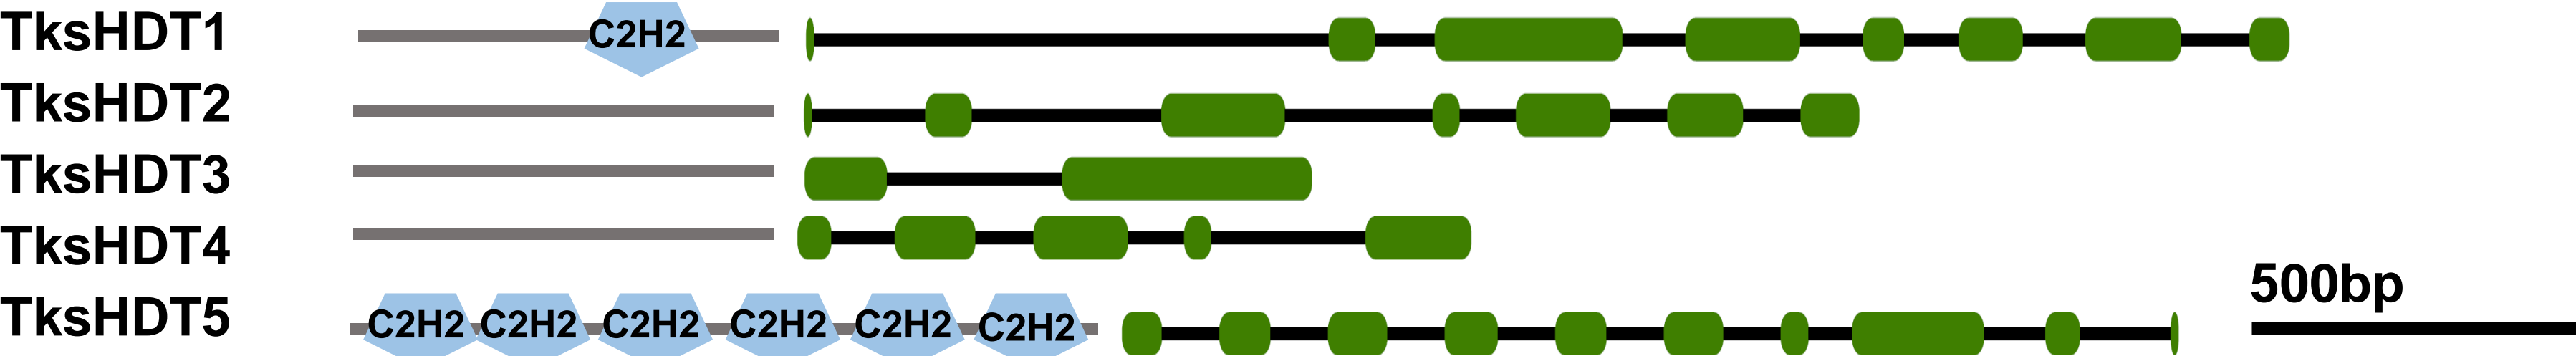

### HDTs Legend:

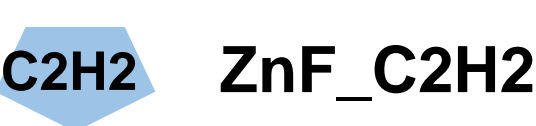

Exon Intron

Figure S5. Domain composition and intron-exon structure of *Taraxacum kok-saghyz* HDAs, SRTs and HDTs.
