# Supplementary material for: Genome-Wide Identification and Spatial Expression Analysis of Histone Modification Gene Families in the Rubber Dandelion Taraxacum kok-saghyz
Source: MDPI journal article supplement (doi:10.3390/plants11162077), 2022-08-09
Supplement: s1 [file s1]

# TksHAM

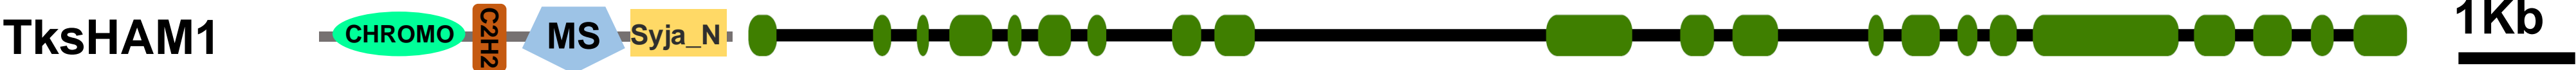

## HAM Legend:

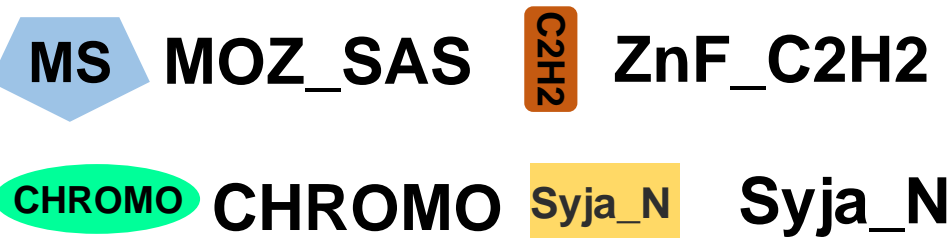

# TksHACs

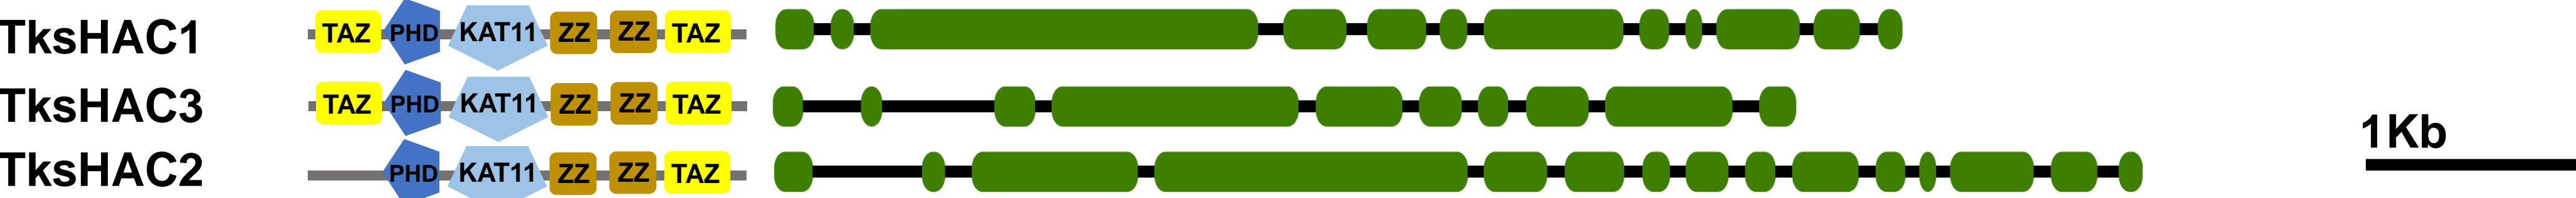

## HACs Legend:

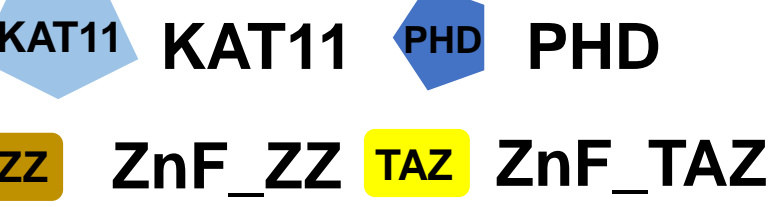

Exon Intron

Figure S3. Domain composition and intron-exon structure of *Taraxacum kok-saghyz* HAMs and HACs.
