# Supplementary material for: Genome-Wide Identification and Spatial Expression Analysis of Histone Modification Gene Families in the Rubber Dandelion Taraxacum kok-saghyz
Source: MDPI journal article supplement (doi:10.3390/plants11162077), 2022-08-09
Supplement: s1 [file s1]

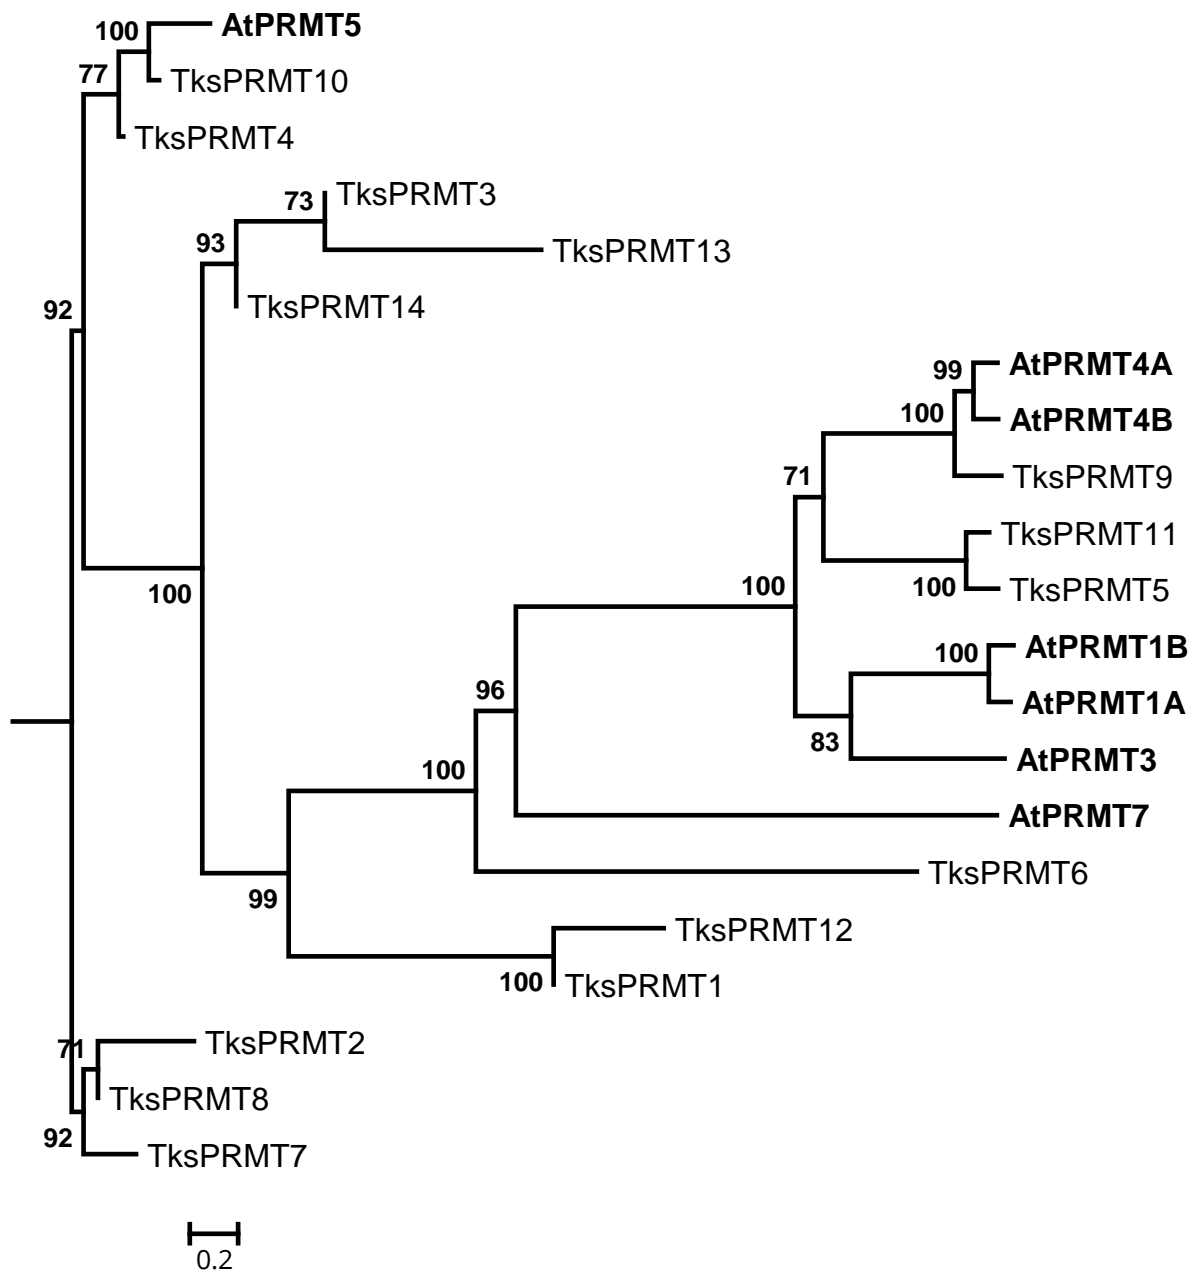

**Figure S1.** Phylogenetic tree of PRMT proteins of *Taraxacum kok-saghyz* and *Arabidopsis* (in bold). The numbers near the tree branches represent bootstrap values.

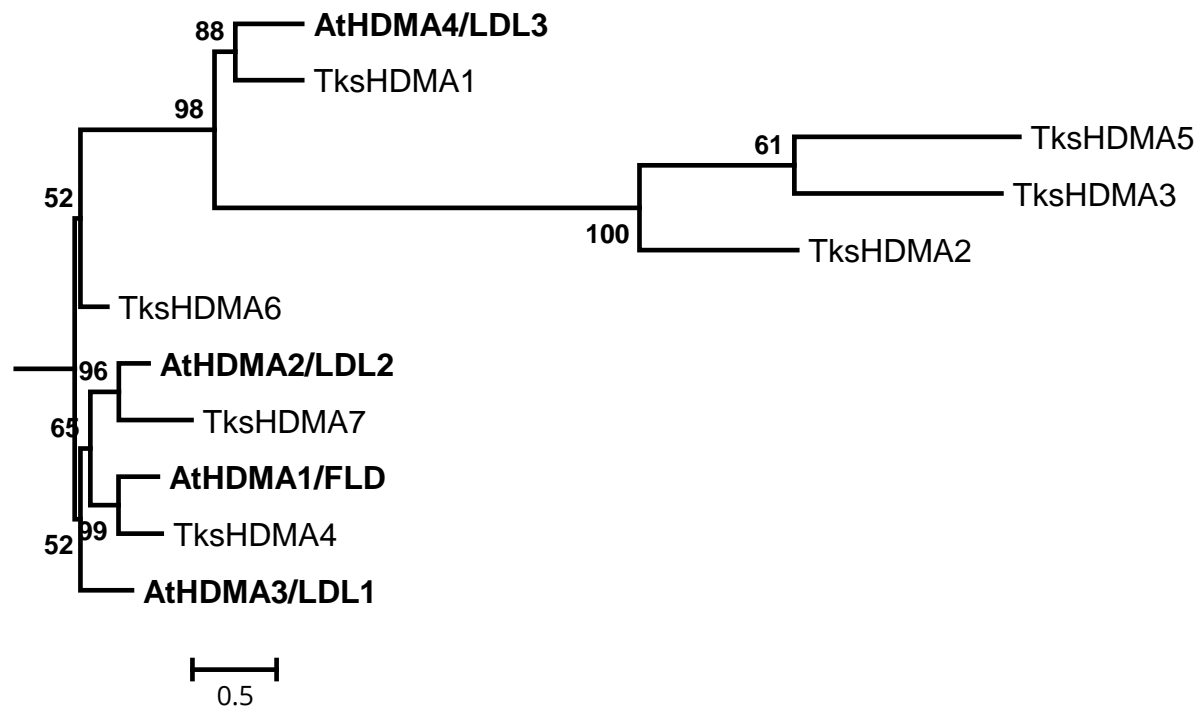

**Figure S2.** Phylogenetic tree of HDMA proteins of *Taraxacum kok-saghyz* and Arabidopsis (in bold). The numbers near the tree branches represent bootstrap values.

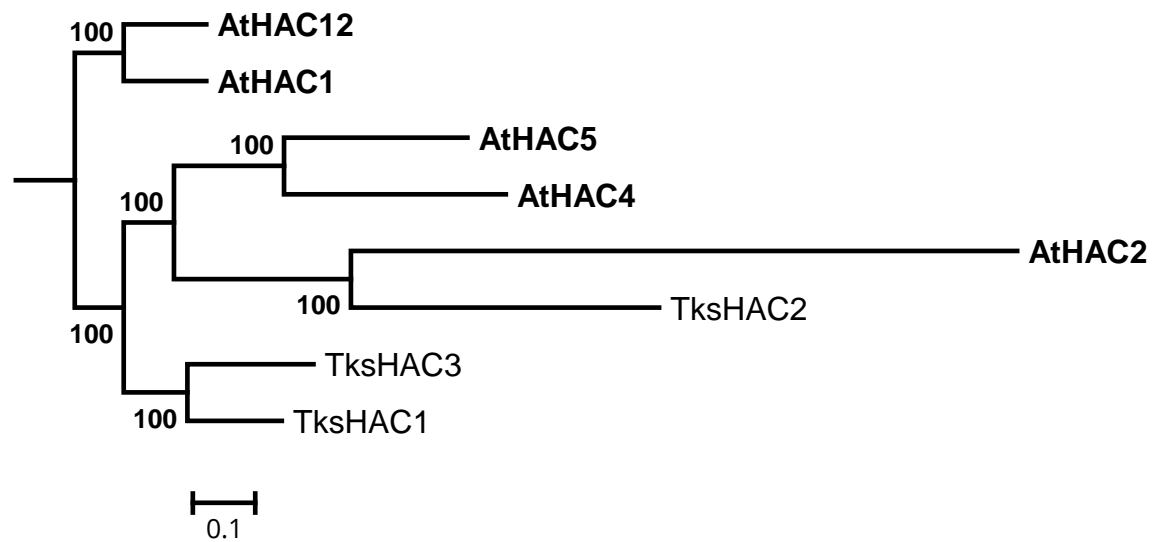

**Figure S4.** Phylogenetic tree of HAC proteins of *Taraxacum kok-saghyz* and *Arabidopsis* (in bold). The numbers near the tree branches represent bootstrap values.

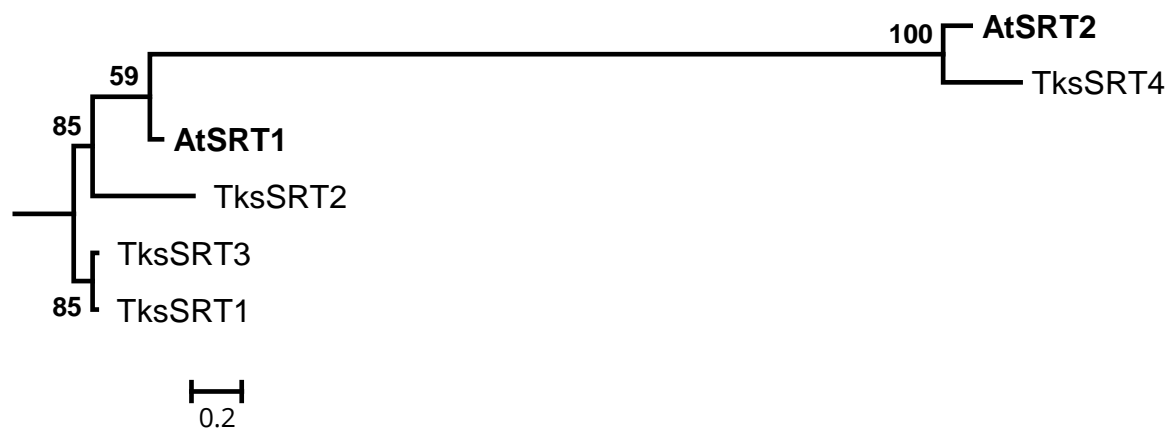

**Figure S6.** Phylogenetic tree of SRT proteins of *Taraxacum kok-saghyz* and *Arabidopsis* (in bold). The numbers near the tree branches represent bootstrap values.

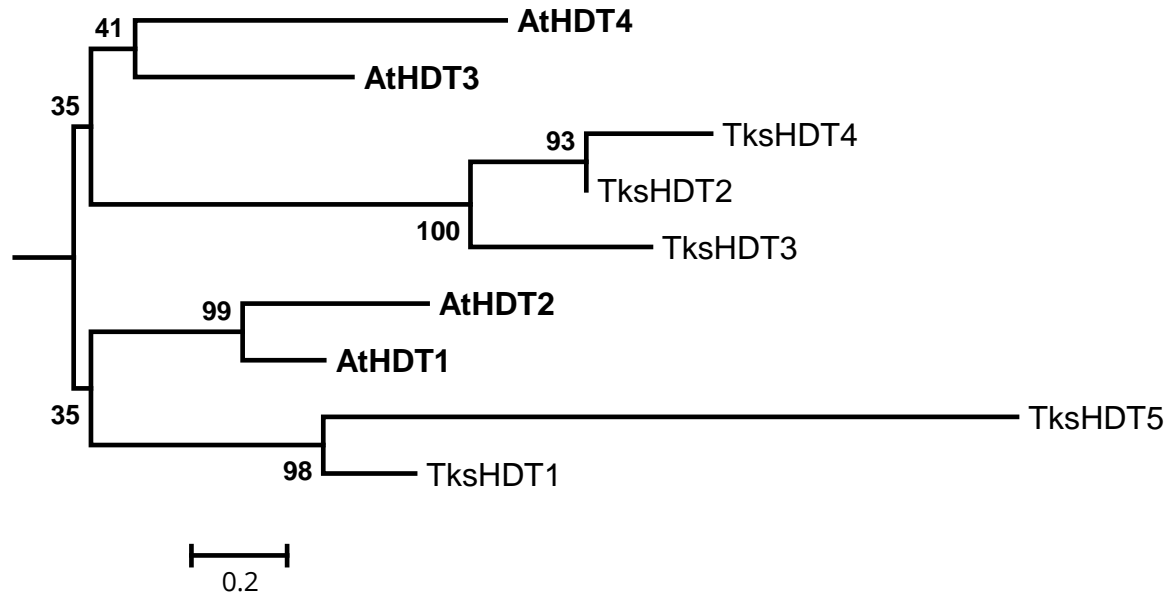

**Figure S7.** Phylogenetic tree of HDT proteins of *Taraxacum kok-saghyz* and *Arabidopsis* (in bold). The numbers near the tree branches represent bootstrap values.
