# Supplementary material for: Genome-Wide Identification and Spatial Expression Analysis of Histone Modification Gene Families in the Rubber Dandelion Taraxacum kok-saghyz
Source: MDPI journal article supplement (doi:10.3390/plants11162077), 2022-08-09
Supplement: s1 [file s1]

Tukey's pairwise test (p<0,05)

| TksHAG10 | DL      | FL      | RT      | R        | TksHDA8  | DL     | FL     | RT     | R        |
|----------|---------|---------|---------|----------|----------|--------|--------|--------|----------|
| DL       |         | 0,112   | 0,6059  | 0,01427  | DL       |        | 0,8504 | 0,8182 | 0,01078  |
| FL       | 3,72    |         | 0,5529  | 0,4877   | FL       | 1,138  |        | 0,9986 | 0,02837  |
| RT       | 1,792   | 1,928   |         | 0,0824   | RT       | 1,236  | 0,2182 |        | 0,05729  |
| R        | 5,821   | 2,1     | 4,028   |          | R        | 6,45   | 5,312  | 4,533  |          |
| TksHDA7  | DL      | FL      | RT      | R        | TksHDA9  | DL     | FL     | RT     | R        |
| DL       |         | 0,7856  | 0,3487  | 0,001569 | DL       |        | 0,9989 | 0,859  | 0,4204   |
| FL       | 1,329   |         | 0,7769  | 0,003967 | FL       | 0,199  |        | 0,7921 | 0,3564   |
| RT       | 2,542   | 1,353   |         | 0,02263  | RT       | 1,111  | 1,31   |        | 0,8371   |
| R        | 9,069   | 7,74    | 5,569   |          | R        | 2,291  | 2,49   | 1,179  |          |
| TksHDMA4 | DL      | FL      | RT      | R        | TksHDMA6 | DL     | FL     | RT     | R        |
| DL       |         | 0,9858  | 0,9765  | 1        | DL       |        | 0,985  | 0,9304 | 0,8399   |
| FL       | 0,4775  |         | 0,8784  | 0,9848   | FL       | 0,4864 |        | 0,7852 | 0,6593   |
| RT       | 0,5691  | 1,047   |         | 0,9778   | RT       | 0,8431 | 1,329  |        | 0,9952   |
| R        | 0,01127 | 0,4888  | 0,5578  |          | R        | 1,171  | 1,657  | 0,328  |          |
| TksJMJ14 | DL      | FL      | RT      | R        | TksJMJ23 | DL     | FL     | RT     | R        |
| DL       |         | 0,9889  | 0,9998  | 0,7735   | DL       |        | 1      | 0,9978 | 0,8803   |
| FL       | 0,4377  |         | 0,9953  | 0,6032   | FL       | 0,0407 |        | 0,9987 | 0,8918   |
| RT       | 0,1106  | 0,3271  |         | 0,7319   | RT       | 0,2531 | 0,2124 |        | 0,9422   |
| R        | 1,361   | 1,799   | 1,472   |          | R        | 1,04   | 0,9991 | 0,7868 |          |
| TksJMJ25 | DL      | FL      | RT      | R        | TksPRMT9 | DL     | FL     | RT     | R        |
| DL       |         | 0,2191  | 0,9996  | 0,9999   | DL       |        | 0,4005 | 0,8191 | 0,2253   |
| FL       | 3,078   |         | 0,3282  | 0,2348   | FL       | 2,35   |        | 0,8571 | 0,9659   |
| RT       | 0,1388  | 2,614   |         | 1        | RT       | 1,233  | 1,117  |        | 0,616    |
| R        | 0,07725 | 3,001   | 0,06966 |          | R        | 3      | 0,6495 | 1,767  |          |
| TksSDG3  | DL      | FL      | RT      | R        | TksSDG4  | DL     | FL     | RT     | R        |
| DL       |         | 0,7528  | 0,7174  | 0,01543  | DL       |        | 0,8551 | 0,8816 | 0,01543  |
| FL       | 1,417   |         | 0,2412  | 0,06152  | FL       | 1,124  |        | 0,4663 | 0,04596  |
| RT       | 1,509   | 2,927   |         | 0,003977 | RT       | 1,036  | 2,159  |        | 0,005998 |
| R        | 5,738   | 4,321   | 7,247   |          | R        | 5,737  | 4,614  | 6,773  |          |
| TksSDG24 | DL      | FL      | RT      | R        |          |        |        |        |          |
| DL       |         | 0,1155  | 0,1259  | 0,002417 |          |        |        |        |          |
| FL       | 3,689   |         | 0,9999  | 0,0725   |          |        |        |        |          |
| RT       | 3,602   | 0,08761 |         | 0,06642  |          |        |        |        |          |
| R        | 7,846   | 4,156   | 4,244   |          |          |        |        |        |          |
